# Supplementary material
Source: Springer Nature journal article supplement (https://www.springermedizin.de/resource/supplementary/13075_2012_3634_MOESM4_ESM.pdf/9694998)

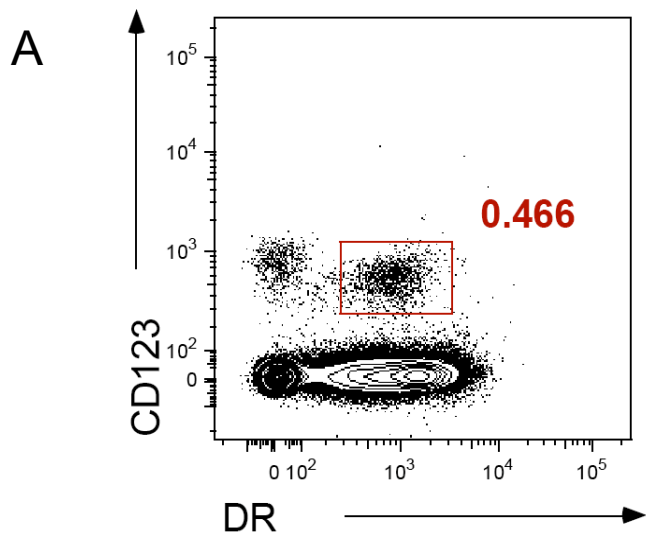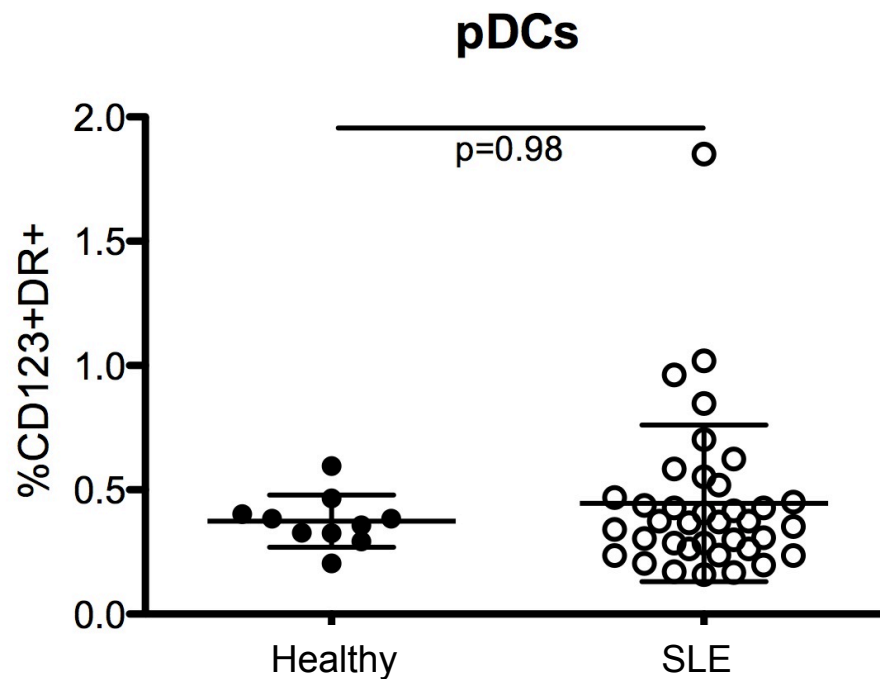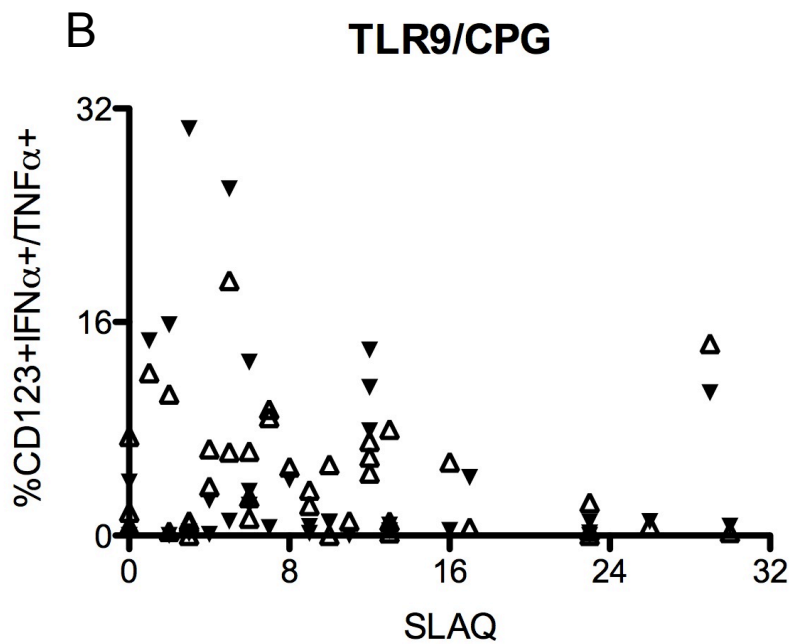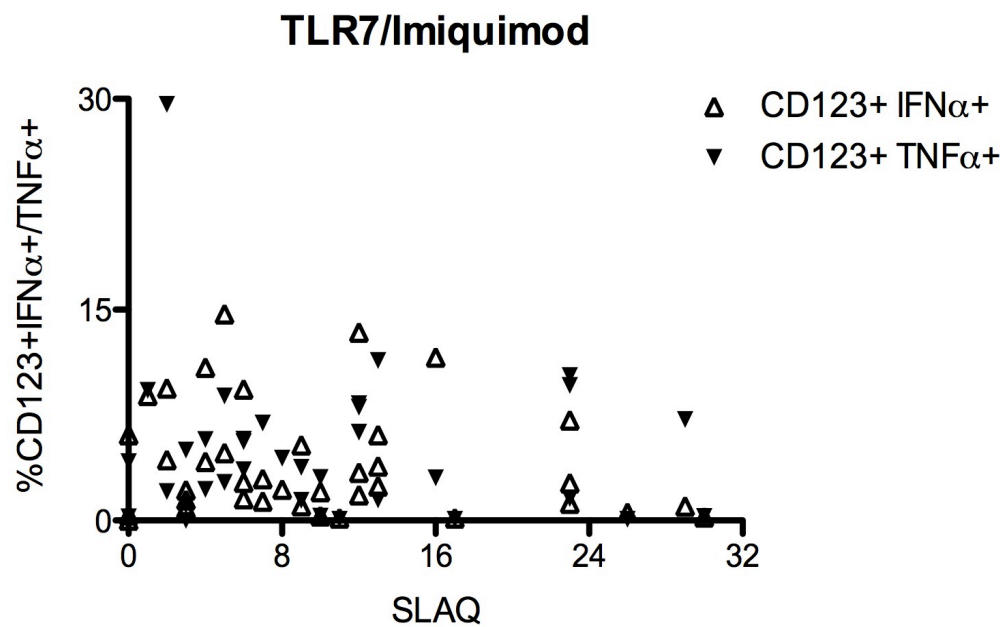

Supplement: MOESM4 [file 9694998]
